# Supplementary material
Source: Springer Nature journal article supplement (https://www.springermedizin.de/resource/supplementary/12943_2014_1462_MOESM2_ESM.pdf/9553066)
Supplement: MOESM2 [file 9553066]

Supplementary Fig. 1

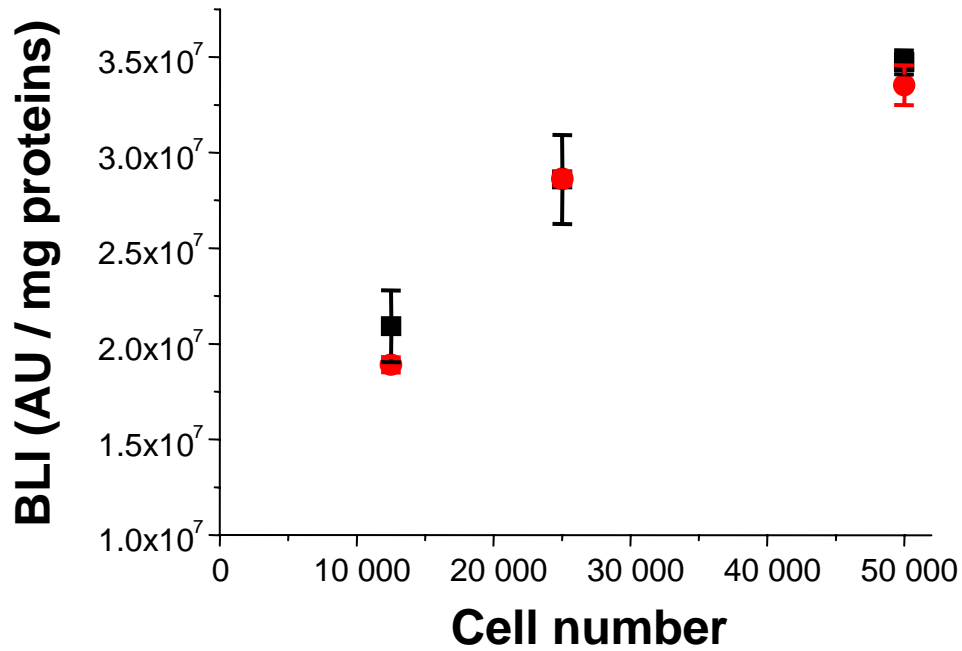

**Supplementary Figure 1 :**

MDA-MB-231-shCTL cells expressing luciferase gene were seeded at different densities then treated for 24h with Ranolazine (50  $\mu$ M, red circles) or not (black squares). After 24h growth, cells were lysed and the bioluminescent signal (BLI) was measured after the addition of luciferin (Luciferase Assay System kit, Promega) and expressed as arbitrary units relativized to the total amount of proteins (AU/mg proteins). Results are expressed as mean  $\pm$  sem. There was no difference between the two conditions.
